# Supplementary figures and images for: Machines flunking an exam: Evaluating large language models on course-related open questions
Source: Research Square preprint supplement (doi:10.21203/rs.3.rs-6679662/v1), 2025-09-30

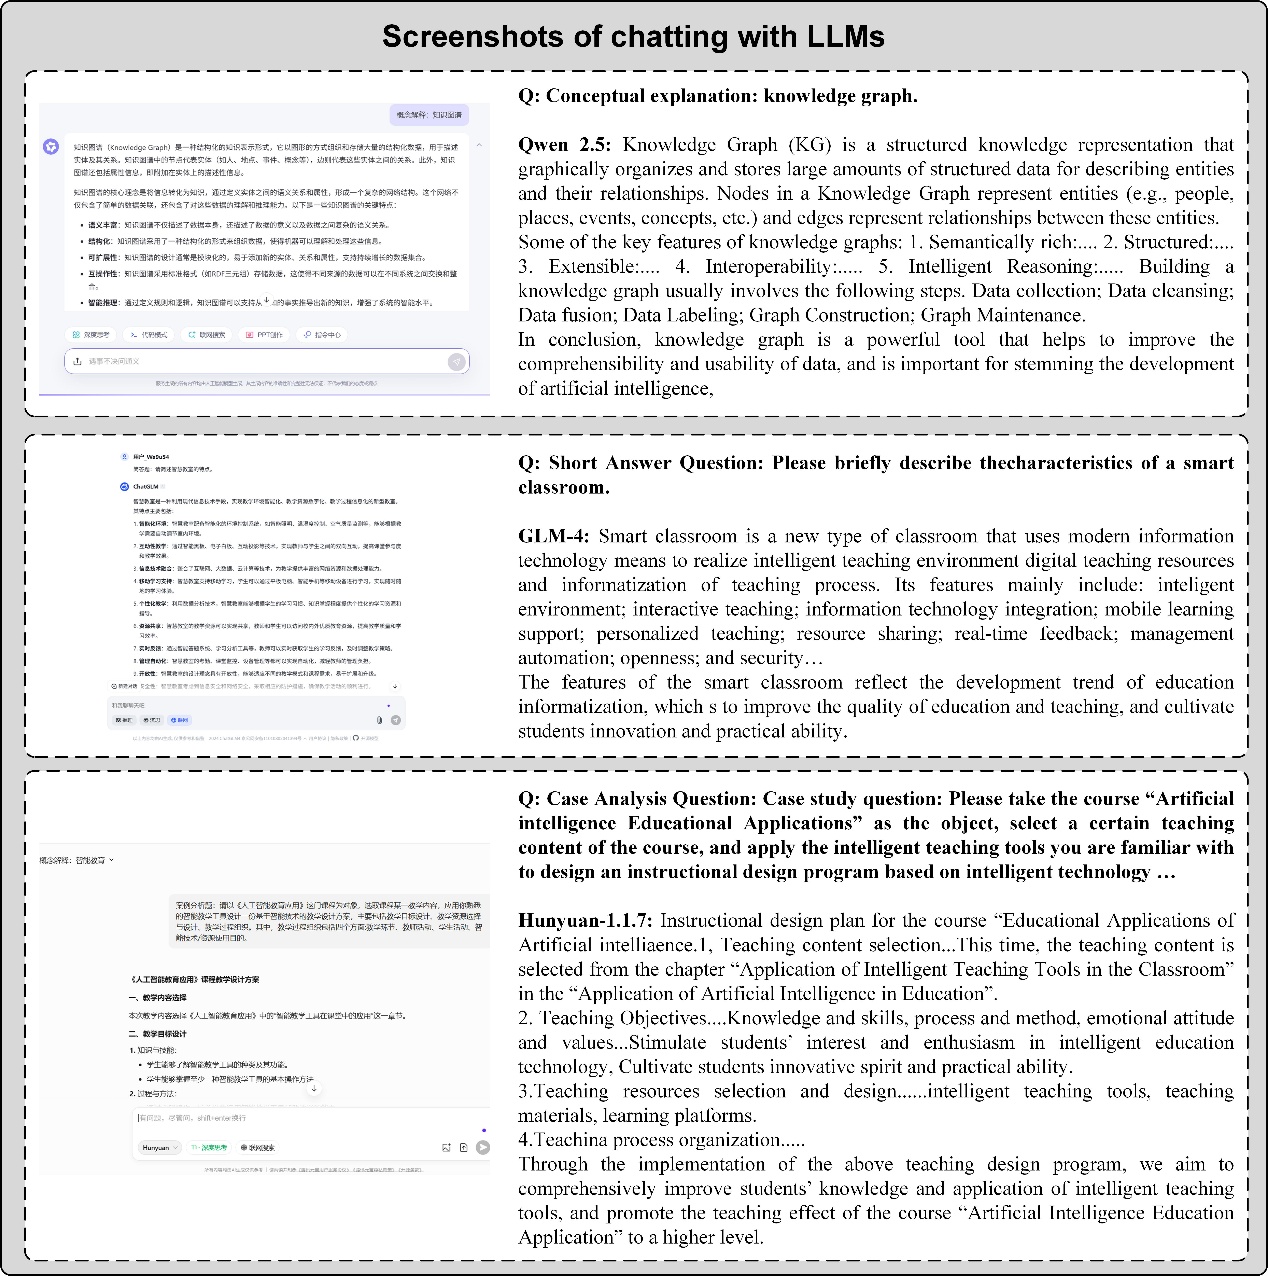


**Supplementary Fig 1.** Snapshot of open-ended questions used for LLM evaluation.

Supplement: Supplementary file 1 [file b3172a3cec7256ea319fc195.docx]
